# Supplementary material
Source: PubMed Central journal article supplement (PMC4104134)
Supplement: NIHMS577632-supplement-supplement_1.pdf [file NIHMS577632-supplement-supplement_1.pdf]

Supplementary Table S1: Consumption of vD supplements (IU/day). Values are means and ranges

| Age period (months) | Vitamin D supplementation (IU/day) |          |           |           |
|---------------------|------------------------------------|----------|-----------|-----------|
|                     | 200                                | 400      | 600       | 800       |
| 1 - 2               | 219                                | 406      | 595       | 800       |
|                     | 46-282                             | 188 -630 | 372-1,033 | 98-1,297  |
| 2 - 4               | 219                                | 388      | 554       | 766       |
|                     | 65-285                             | 183-489  | 343-693   | 414-1,612 |
| 4 – 5.5             | 230                                | 427      | 563       | 786       |
|                     | 85-341                             | 306-530  | 285-888   | 394-1,140 |
| 5.5 – 7.5           | 222                                | 406      | 560       | 817       |
|                     | 58-289                             | 237-552  | 215-715   | 495-1,065 |
| 7.5 - 9             | 231                                | 405      | 572       | 785       |
|                     | 120-300                            | 119-857  | 0-761     | 339-1,086 |

Supplementary Table S2: Number of low 25(HO)D levels by supplement dose and age

| Age (mo) | 25(HO)D level (nmol/L) | Vitamin D supplement (IU/day) |     |     |     |    |
|----------|------------------------|-------------------------------|-----|-----|-----|----|
|          |                        | 200                           | 400 | 600 | 800 |    |
| 2        | <12.5                  | 0                             | 0   | 0   | 0   | 24 |
|          | 12.5 - 29.9            | 3                             | 2   | 1   | 0   |    |
|          | 30 - 49.9              | 10                            | 2   | 3   | 3   |    |
| 4        | <12.5                  | 0                             | 0   | 0   | 0   | 16 |
|          | 12.5 - 29.9            | 2                             | 3   | 0   | 0   |    |
|          | 30 - 49.9              | 3                             | 5   | 1   | 2   |    |
| 5.5      | <12.5                  | 1                             | 2   | 0   | 0   | 12 |
|          | 12.5 - 29.9            | 4                             | 0   | 1   | 0   |    |
|          | 30 - 49.9              | 0                             | 3   | 1   | 0   |    |
| 7.5      | <12.5                  | 0                             | 1   | 0   | 0   | 5  |
|          | 12.5 - 29.9            | 1                             | 0   | 0   | 0   |    |
|          | 30 - 49.9              | 1                             | 0   | 2   | 0   |    |
| 9        | <12.5                  | 0                             | 0   | 0   | 0   | 3  |
|          | 12.5 - 29.9            | 0                             | 0   | 0   | 0   |    |
|          | 30 - 49.9              | 1                             | 1   | 1   | 0   |    |
| 12       | <12.5                  | 0                             | 0   | 0   | 0   | 3  |
|          | 12.5 - 29.9            | 0                             | 0   | 0   | 0   |    |
|          | 30 - 49.9              | 1                             | 1   | 1   | 0   |    |
| Total    |                        | 27                            | 20  | 11  | 5   | 63 |

Supplementary Table S3: Data for subjects with multiple deficient plasma 25(OH)D levels (8 females, 7 males; birth months June through November)

| Subject            | Dose <sup>a</sup> |                      | Age (months) |             |             |             |                   |                   |                   |
|--------------------|-------------------|----------------------|--------------|-------------|-------------|-------------|-------------------|-------------------|-------------------|
|                    |                   |                      | 1            | 2           | 4           | 5.5         | 7.5               | 9                 | 12                |
| 17133              | 200               | 25(OH)D <sup>b</sup> | <i>16.2</i>  | <i>43.0</i> | 70.2        | 80.0        | 57.0              | <i>36.0</i>       | 107.8             |
|                    |                   | Intake <sup>c</sup>  |              | 174         | 136         | 197         | 167               | 227               |                   |
| 17143 <sup>d</sup> | 200               | 25(OH)D              | <i>31.0</i>  | <i>48.8</i> | 53.0        | <i>23.5</i> | <i>33.2</i>       | 90.83             | 95.0              |
|                    |                   | Intake               |              | 212         | 212         | 256         | 227               | 228               |                   |
| 17165              | 200               | 25(OH)D              | <i>18.2</i>  | <i>13.5</i> | <i>16.2</i> | <i>7.8</i>  | 62.0              | 71.8              | 79.8              |
|                    |                   | Intake               |              | 246         | 285         | 221         | 205               | 249               |                   |
| 17169              | 200               | 25(OH)D              | <i>15.5</i>  | <i>42.2</i> | <i>31.8</i> | <i>25.2</i> | 79.5              | 65.5              | 64.2              |
|                    |                   | Intake               |              | 196         | 268         | 224         | 230               | 235               |                   |
| 17201 <sup>e</sup> | 200               | 25(OH)D              | <i>26.0</i>  | <i>44.8</i> | <i>32.0</i> | <i>17.8</i> | <i>29.5</i>       |                   |                   |
|                    |                   | Intake               |              | 46          | 38          | 181         |                   |                   |                   |
| 17277              | 200               | 25(OH)D              | <i>26.0</i>  | 56.8        | <i>25.8</i> | <i>12.5</i> | 61.2              | 104.8             | 84.0              |
|                    |                   | Intake               |              | 260         | 311         | 280         | 268               | 263               |                   |
| 17911              | 200               | 25(OH)D              | <i>9.8</i>   | <i>48.0</i> | <i>44.2</i> | 81.5        | 110.2             | 99.5              |                   |
|                    |                   | Intake               |              | 172         | 305         | 235         | 157               |                   |                   |
| 17194              | 400               | 25(OH)D              | <i>23.5</i>  | 60.8        | <i>23.0</i> | <i>12.0</i> | <i>7.0</i>        | <b>56.8</b>       | <b>53.0</b>       |
|                    |                   | Intake               |              | 326         | 400         | 444         | 573               | 2000 <sup>f</sup> | 2000 <sup>f</sup> |
| 17215              | 400               | 25(OH)D              | 54.5         | 64.2        | <i>16.8</i> | <i>11.8</i> | <b>67.0</b>       | -                 | -                 |
|                    |                   | Intake               |              | 364         | 371         | 428         | 2000 <sup>f</sup> |                   |                   |
| 17916              | 400               | 25(OH)D              | <i>27.8</i>  | <i>37.0</i> | <i>24.0</i> | <i>42.2</i> | -                 | -                 | -                 |
|                    |                   | Intake               |              | 629         |             | 505         |                   |                   |                   |
| 17931              | 400               | 25(OH)D              | <i>48.5</i>  | <i>27.0</i> | <i>48.5</i> | <i>32.8</i> | 68.0              | 60.5              | 87.2              |
|                    |                   | Intake               |              | 345         | 203         | 778         | 268               | 333               |                   |
| 17950              | 400               | 25(OH)D              | <i>44.5</i>  | <i>42.2</i> | <i>47.2</i> | <i>43.0</i> | 51.5              | 71.5              | 73.0              |
|                    |                   | Intake               |              | 428         | 397         | 414         | 378               | 357               |                   |
| 17144              | 600               | 25(OH)D              | <i>33.0</i>  | 67.0        | <i>45.0</i> | <i>23.2</i> | <i>42.5</i>       |                   | 85.5              |
|                    |                   | Intake               |              | 418         | 483         | 668         | 610               | 285               |                   |
| 17173              | 600               | 25(OH)D              | <i>35.8</i>  | 53.0        | 59.8        | <i>48.5</i> | <i>43.2</i>       | 38.5              |                   |
|                    |                   | Intake               |              | 601         | 570         | 539         | 504               |                   |                   |
| 17280              | 800               | 25(OH)D              | <i>38.8</i>  | <i>40.2</i> | <i>47.8</i> | 50.0        | 98.2              | 121.8             | 72.0              |
|                    |                   | Intake               |              | 738         | 830         | 1229        | 903               | 889               |                   |

<sup>a</sup> dose of vitamin D supplement in IU/d

<sup>b</sup> plasma concentration in nmol/L; low (<50 nmol/L) values *in italics*, values after therapeutic intervention in **bold**

<sup>c</sup> actual intake of supplemental vitamin D in IU/d

<sup>d</sup> subject with dark skin pigmentation

<sup>e</sup> parents indicated study drops not given regularly

<sup>f</sup> therapeutic dose recommended (IU/d)
